# Supplementary material for: Phenotypic Features and Genetic Findings in a Cohort of Italian Pseudoxanthoma Elasticum Patients and Update of the Ophthalmologic Evaluation Score
Source: MDPI journal article supplement (doi:10.3390/jcm10122710), 2021-06-19
Supplement: s1 [file s1]

**Table S1.** Rare sequence variants found in Italian PXE patients and classified in according to American College of Medical Genetics and Genomics and Association for Molecular Pathology (ACMG) using VarSome platform. dbSNP= single nucleotide polymorphism database; N= new rare sequence variant; F= rare sequence variant frequency in relation to the other sequence variants detected within the Italian PXE patient cohort.

| Intron<br>/<br>Exon | Nucleotide variation | Amino acid variation         | F (%) | dbSNP        | Class ACMG                |
|---------------------|----------------------|------------------------------|-------|--------------|---------------------------|
| IVS1                | c.36+1dupG           | Loss of splice donor site    | 0,188 | /            | Likely pathogenic         |
| IVS1                | c.36+1G>C            | Loss of splice donor site    | 0,942 | /            | Pathogenic                |
| 2                   | c.113G>C             | p.Trp38Ser                   | 0,753 | rs72653752   | Likely pathogenic         |
| 2                   | c.117_118insC        | p.Met42HisfsTer59            | 0,188 | rs746531177  | Pathogenic                |
| 2                   | c.196dupT            | p.Ser66PhefsTer35            | 0,753 | rs1064793538 | Pathogenic                |
| 5                   | c.557delT            | p.Leu186ArgfsTer46           | 0,753 | rs1342109356 | Pathogenic                |
| 6                   | c.613G>T             | p.Glu205Ter                  | 0,377 | /            | Pathogenic                |
| IVS7                | c.794+1G>A           | Loss of splice donor site    | 0,565 | rs775749515  | Pathogenic                |
| 8                   | c.913C>T             | p.Gln305Ter                  | 0,377 | rs746625905  | Pathogenic                |
| 8                   | c.940G>A             | p.Gly314Arg                  | 0,565 | /            | Likely pathogenic         |
| 8                   | c.951C>A             | p.Ser317Arg                  | 0,942 | rs78678589   | Pathogenic                |
| 8                   | c.956T>A             | p.Ile319Asn                  | 0,188 | /            | Likely pathogenic         |
| 8                   | c.960delC            | p.Ser321ValfsTer35           | 0,188 | rs72664226   | Pathogenic                |
| 8                   | c.989delA            | p.Lys330SerfsTer26           | 0,377 | /            | Pathogenic                |
| 9                   | c.1091C>G            | p.Thr364Arg                  | 0,565 | rs72653759   | Likely pathogenic         |
| 9                   | c.1132C>T            | p.Gln378Ter                  | 4,896 | rs72650699   | Pathogenic                |
| 9                   | c.1145G>A            | p.Arg382Gln                  | 0,188 | rs776373779  | Likely pathogenic         |
| 9                   | c.1160G>T            | p.Gly387Val                  | 0,188 | rs771256512  | Likely pathogenic         |
| 9                   | c.1171A>G            | p.Arg391Gly                  | 2,260 | rs72653762   | Pathogenic                |
| 9                   | c.1174A>G            | p.Lys392Glu                  | 0,188 | rs756498547  | Pathogenic                |
| 9                   | c.1175A>G            | p.Lys392Arg                  | 0,188 | rs748562202  | Pathogenic                |
| 10                  | c.1220G>A            | p.Gly407Asp                  | 0,188 | rs866947308  | Likely pathogenic         |
| 10                  | c.1220G>T            | p.Gly407Val                  | 0,188 | /            | Likely pathogenic         |
| 10                  | c.1255C>T            | p.Arg419Trp                  | 0,188 | rs775853778  | Likely pathogenic         |
| 10                  | c.1256G>A            | p.Arg419Gln                  | 0,188 | rs772434460  | Pathogenic                |
| 10                  | c.1284C>G            | p.Asn428Lys                  | 0,188 | /            | Likely pathogenic         |
| 10                  | c.1308G>A            | p.Trp436Ter                  | 0,565 | /            | Pathogenic                |
| 10                  | c.1318T>G            | p.Cys440Gly                  | 0,188 | rs72653766   | Likely pathogenic         |
| 12                  | c.1484T>A            | p.Leu495His                  | 0,377 | rs72653769   | Likely pathogenic         |
| 12                  | c.1526C>G            | p.Ala509Gly                  | 0,188 | rs779408186  | Likely pathogenic         |
| 12                  | c.1552C>T            | p.Arg518Ter                  | 6,403 | rs72650700   | Pathogenic                |
| 12                  | c.1553G>A            | p.Arg518Gln                  | 6,026 | rs72653772   | Pathogenic                |
| IVS13               | c.1779+1G>C          | Loss of splice donor site    | 0,188 | rs768037422  | Pathogenic                |
| 14                  | c.1798C>T            | p.Arg600Cys                  | 0,377 | rs72653777   | Likely pathogenic         |
| 14                  | c.1799G>A            | p.Arg600His                  | 0,188 | rs761433545  | Likely pathogenic         |
| 14                  | c.1857dupC           | p.Ser620LeufsTer121          | 0,565 | rs72664218   | Pathogenic                |
| 16                  | c.1961C>T            | p.Pro654Leu                  | 0,188 | rs754695089  | Likely pathogenic         |
| 16                  | c.1987G>A            | p.Gly663Ser                  | 0,188 | rs72653780   | Likely pathogenic         |
| 16                  | c.1987G>T            | p.Gly663Cys                  | 0,188 | rs72653780   | Likely pathogenic         |
| 16                  | c.1999delG           | p.Ala667GlnfsTer21           | 2,448 | rs72664227   | Pathogenic                |
| 17                  | c.2018T>C            | p.Leu673Pro                  | 0,188 | rs67470842   | Likely pathogenic         |
| 17                  | c.2093A>C            | p.Gln698Pro                  | 0,188 | rs72653783   | Likely pathogenic         |
| 17                  | c.2095G>A            | p.Glu699Lys                  | 0,188 | rs1445084199 | Likely pathogenic         |
| 17                  | c.2153C>A            | p.Asp718Gly                  | 0,188 | rs1357894483 | Uncertain<br>significance |
| IVS17               | c.2248-2_2248-1delAG | Loss of splice acceptor site | 0,942 | rs111113624  | Pathogenic                |
| IVS17               | c.2247+1G>A          | Loss of splice donor site    | 0,565 | rs781190396  | Pathogenic                |
| 18                  | c.2263G>A            | p.Gly755Arg                  | 0,377 | rs72653787   | Pathogenic                |

|       |                                   |                              |        |              |                        |
|-------|-----------------------------------|------------------------------|--------|--------------|------------------------|
| 18    | c.2264G>A                         | p.Gly755Glu                  | 0,188  | /            | Likely pathogenic      |
| 18    | c.2266G>A                         | p.Gly756Ser                  | 0,377  | rs1022850449 | Likely pathogenic      |
| 18    | c.2278C>T                         | p.Arg760Trp                  | 0,942  | rs72653788   | Likely pathogenic      |
| 18    | c.2294G>A                         | p.Arg765Gln                  | 0,942  | rs67561842   | Pathogenic             |
| 18    | c.2307_2308insA                   | p.Ala771GlyfsTer8            | 0,188  | /            | Pathogenic             |
| 18    | c.2329G>A                         | p.Asp777Asn                  | 0,753  | rs72653790   | Likely pathogenic      |
| 18    | c.2383G>T                         | p.Val795Phe                  | 0,377  | /            | Likely pathogenic      |
| 19    | c.2419C>T                         | p.Arg807Trp                  | 1,130  | rs72653793   | Likely pathogenic      |
| 19    | c.2428G>A                         | p.Val810Met                  | 0,188  | rs72653795   | Likely pathogenic      |
| 19    | c.2458G>C                         | p.Ala820Pro                  | 0,188  | rs72653797   | Likely pathogenic      |
| 19    | c.2477T>C                         | p.Leu826Pro                  | 0,188  | rs72653798   | Likely pathogenic      |
| 19    | c.2504G>A                         | p.Gly835Asp                  | 0,188  | rs199990104  | Likely pathogenic      |
| 21    | c.2678C>A                         | p.Ser893Ter                  | 0,377  | rs1481200467 | Likely pathogenic      |
| 21    | c.2728_2746dupTGGATGACCCTGACAGGGC | p.Trp918Ter                  | 0,188  | /            | Pathogenic             |
| IVS21 | c.2787+1G>T                       | Loss of splice donor site    | 0,753  | rs72664209   | Pathogenic             |
| 22    | c.2836_2860delinsTCTGCCTCT        | p.Leu946SerfsTer18           | 0,188  | /            | Pathogenic             |
| 22    | c.2848G>A                         | p.Ala950Thr                  | 0,188  | rs72657689   | Likely pathogenic      |
| 22    | c.2900G>A                         | p.Trp967Ter                  | 0,188  | /            | Pathogenic             |
| 23    | c.3037G>A                         | p.Gly1013Arg                 | 0,188  | /            | Likely pathogenic      |
| 23    | c.3088C>T                         | p.Arg1030Ter                 | 1,695  | rs72653705   | Pathogenic             |
| 23    | c.3109G>A                         | p.Glu1037Lys                 | 0,188  | rs754074990  | Likely pathogenic      |
| 23    | c.3142_3144delTTC                 | p.Phe1048del                 | 0,188  | rs769437554  | Likely pathogenic      |
| 24    | c.3340C>T                         | p.Arg1114Cys                 | 1,695  | rs63749794   | Likely pathogenic      |
| 24    | c.3341G>A                         | p.Arg1114His                 | 0,188  | rs63750427   | Likely pathogenic      |
| 24    | c.3380T>C                         | p.Met1127Thr                 | 0,377  | rs63749998   | Likely pathogenic      |
| 24    | c.3389C>T                         | p.Thr1130Met                 | 0,188  | rs63750459   | Likely pathogenic      |
| 24    | c.3398G>A                         | p.Gly1133Asp                 | 0,188  | /            | Likely pathogenic      |
| 24    | c.3412C>T                         | p.Arg1138Trp                 | 0,753  | rs28939701   | Pathogenic             |
| 24    | c.3413G>A                         | p.Arg1138Gln                 | 1,507  | rs60791294   | Likely pathogenic      |
| 24    | c.3421C>T                         | p.Arg1141Ter                 | 24,294 | rs72653706   | Pathogenic             |
| 24    | c.3490C>T                         | p.Arg1164Ter                 | 1,507  | rs72653744   | Pathogenic             |
| 24    | c.3491G>A                         | p.Arg1164Gln                 | 0,377  | rs63750457   | Likely pathogenic      |
| 24    | c.3307-940_3506+660del            | p.?                          | 0,188  | /            | Pathogenic             |
| 25    | c.3542G>A                         | p.Gly1181Asp                 | 0,188  | rs114928628  | Likely pathogenic      |
| 25    | c.3544dupC                        | p.Leu1182ProfsTer96          | 0,188  | rs1555508630 | Pathogenic             |
| 25    | c.3563C>G                         | p.Thr1188Arg                 | 0,188  | /            | Uncertain significance |
| 26    | c.3661C>T                         | p.Arg1221Cys                 | 0,565  | rs63751215   | Likely pathogenic      |
| 26    | c.3662G>A                         | p.Arg1221His                 | 0,377  | rs63751001   | Likely pathogenic      |
| 26    | c.3677T>C                         | p.Leu1226Pro                 | 0,377  | rs770483331  | Likely pathogenic      |
| 26    | c.3700G>A                         | p.Glu1234Lys                 | 0,188  | /            | Uncertain significance |
| 26    | c.3712G>T                         | p.Asp1238Tyr                 | 0,565  | /            | Likely pathogenic      |
| 26    | c.3735G>A                         | p.Glu1245=                   | 0,188  | rs281865557  | Likely pathogenic      |
| IVS26 | c.3736-1G>A                       | Loss of splice acceptor site | 2,448  | rs63750273   | Pathogenic             |
| 27    | c.3774_3775insC                   | p.Trp1259LeufsTer19          | 1,130  | rs72664220   | Pathogenic             |
| 27    | c.3823C>T                         | p.Arg1275Ter                 | 0,188  | rs72653749   | Pathogenic             |
| 27    | c.3871delG                        | p.Ala1291GlnfsTer68          | 0,377  | /            | Likely pathogenic      |
| 27    | c.3880_3882delAAG                 | p.Lys1294del                 | 0,565  | rs72664235   | Likely pathogenic      |
| 28    | c.3892G>A                         | p.Val1298Ile                 | 0,188  | rs63751325   | Likely pathogenic      |
| 28    | c.3902C>T                         | p.Thr1301Ile                 | 0,188  | rs63750494   | Likely pathogenic      |
| 28    | c.3904G>A                         | p.Gly1302Arg                 | 0,188  | rs63749856   | Pathogenic             |
| 28    | c.3940C>T                         | p.Arg1314Trp                 | 0,565  | rs63750759   | Likely pathogenic      |
| 28    | c.3989T>C                         | p.Ile1330Thr                 | 0,188  | rs760794410  | Likely pathogenic      |
| 29    | c.4015C>T                         | p.Arg1339Cys                 | 0,565  | rs28939702   | Likely pathogenic      |
| 29    | c.4036C>T                         | p.Pro1346Ser                 | 0,188  | rs63751112   | Pathogenic             |

|       |                              |                           |       |              |                   |
|-------|------------------------------|---------------------------|-------|--------------|-------------------|
| 29    | c.4041G>A                    | p.Gln1347=                | 0,188 | rs63751111   | Likely pathogenic |
| 29    | c.4055T>C                    | p.Phe1352Ser              | 0,188 | /            | Likely pathogenic |
| 29    | c.4070G>C                    | p.Arg1357Pro              | 0,188 | /            | Likely pathogenic |
| 29    | c.4159_4171dupCTGCCCCGGCCAGC | p.Leu1391ProfsTer10       | 0,377 | rs747334212  | Pathogenic        |
| 29    | c.4182delG                   | p.Lys1394AsnfsTer9        | 0,753 | rs67791546   | Pathogenic        |
| 29    | c.4198G>A                    | p.Glu1400Lys              | 1,318 | rs63751241   | Pathogenic        |
| IVS29 | c.4208+1G>A                  | Loss of splice donor site | 0,188 | rs1481973160 | Pathogenic        |
| 30    | c.4318delA                   | p.Met1440CysfsTer24       | 0,377 | rs72664238   | Pathogenic        |
| 30    | c.4361T>C                    | p.Leu1454Pro              | 0,188 | /            | Likely pathogenic |
| 30    | c.4403G>A                    | p.Arg1468Gln              | 0,188 | rs761098006  | Pathogenic        |
| 30    | c.del30                      | p.?                       | 0,377 | /            | Pathogenic        |
| 1_31  | c.1_4511del                  | p.?                       | 0,942 | /            | Pathogenic        |
| 11_18 | c.dup11-18                   | p.?                       | 0,188 | /            | Pathogenic        |
| 23_29 | c.2996_4208del               | p.?                       | 5,838 | /            | Pathogenic        |
| 24_27 | c.3307-1006_3735+1582del     | p.?                       | 0,753 | /            | Pathogenic        |
| 25_27 | c.3507_3882del               | p.?                       | 0,377 | /            | Pathogenic        |
