# Supplementary material for: Phenotypic Features and Genetic Findings in a Cohort of Italian Pseudoxanthoma Elasticum Patients and Update of the Ophthalmologic Evaluation Score
Source: MDPI journal article supplement (doi:10.3390/jcm10122710), 2021-06-19
Supplement: s1 [file s1]

**Table S3.** Ocular manifestations in PXE patients.

| ID | Age | Sex | Eye | Visual acuity (Snellen) | EqS   | Anterior segment    | PO | CO | AS | Foveal AS | Peripheral CL | Peripapillary CL | CNV         | PD like changes | Atrophy                     | Disc drusen |
|----|-----|-----|-----|-------------------------|-------|---------------------|----|----|----|-----------|---------------|------------------|-------------|-----------------|-----------------------------|-------------|
| 1  | 7   | F   | RE  | 10/10                   | 0.00  | N                   | p  | p  | nd | nd        | p             | nd               | nd          | nd              | nd                          | nd          |
|    |     |     | LE  | 10/10                   | 0.00  | N                   | p  | p  | nd | nd        | p             | nd               | nd          | nd              | nd                          | nd          |
| 2  | 9   | M   | RE  | 10/10                   | -0.63 | N                   | p  | p  | nd | nd        | p             | nd               | nd          | nd              | nd                          | nd          |
|    |     |     | LE  | 10/10                   | -1.75 | N                   | p  | p  | nd | nd        | p             | nd               | nd          | nd              | nd                          | nd          |
| 3  | 20  | M   | RE  | 10/10                   | 0.00  | N                   | p  | p  | p  | nd        | p             | p                | nd          | nd              | nd                          | nd          |
|    |     |     | LE  | 10/10                   | 0.00  | N                   | p  | p  | p  | nd        | p             | p                | nd          | nd              | nd                          | nd          |
| 4  | 23  | F   | RE  | 10/10                   | 0.00  | N                   | p  | p  | p  | p         | p             | p                | nd          | nd              | nd                          | nd          |
|    |     |     | LE  | 10/10                   | 0.00  | N                   | p  | p  | p  | p         | p             | p                | nd          | nd              | nd                          | nd          |
| 5  | 24  | F   | RE  | 10/10                   | 0.00  | N                   | p  | p  | p  | nd        | p             | p                | nd          | nd              | nd                          | nd          |
|    |     |     | LE  | 10/10                   | 0.00  | N                   | p  | p  | p  | nd        | p             | p                | nd          | nd              | nd                          | nd          |
| 6  | 24  | F   | RE  | 10/10                   | 0.00  | N                   | p  | p  | nd | nd        | nd            | nd               | nd          | nd              | nd                          | nd          |
|    |     |     | LE  | 10/10                   | 0.00  | N                   | p  | p  | nd | nd        | nd            | nd               | nd          | nd              | nd                          | nd          |
| 7  | 27  | F   | RE  | 10/10                   | 0.00  | N                   | p  | p  | p  | nd        | p             | nd               | nd          | nd              | nd                          | nd          |
|    |     |     | LE  | 10/10                   | 0.00  | N                   | p  | p  | p  | p         | p             | p                | nd          | nd              | nd                          | nd          |
| 8  | 28  | F   | RE  | 10/10                   | -2.75 | N                   | p  | p  | p  | p         | nd            | nd               | nd          | nd              | nd                          | nd          |
|    |     |     | LE  | 10/10                   | -2.75 | N                   | p  | p  | p  | p         | nd            | nd               | nd          | nd              | nd                          | nd          |
| 9  | 29  | F   | RE  | 10/10                   | -5.25 | N                   | p  | p  | p  | nd        | p             | nd               | nd          | nd              | nd                          | p           |
|    |     |     | LE  | 10/10                   | -3.75 | N                   | p  | p  | p  | nd        | p             | nd               | nd          | nd              | nd                          | p           |
| 10 | 30  | F   | RE  | 10/10                   | 0.00  | N                   | p  | p  | p  | nd        | p             | nd               | nd          | nd              | nd                          | nd          |
|    |     |     | LE  | 10/10                   | 0.00  | N                   | p  | p  | p  | nd        | nd            | nd               | nd          | nd              | nd                          | nd          |
| 11 | 30  | F   | RE  | 10/10                   | 0.00  | N                   | p  | p  | p  | nd        | p             | p                | nd          | nd              | nd                          | nd          |
|    |     |     | LE  | 10/10                   | 0.00  | N                   | p  | p  | p  | nd        | p             | p                | nd          | nd              | nd                          | nd          |
| 12 | 31  | F   | RE  | 10/10                   | 0.00  | N                   | p  | p  | p  | nd        | p             | nd               | nd          | nd              | nd                          | nd          |
|    |     |     | LE  | 10/10                   | 0.00  | N                   | p  | p  | p  | nd        | p             | nd               | nd          | nd              | nd                          | nd          |
| 13 | 31  | F   | RE  | 10/10                   | 0.00  | N                   | p  | p  | nd | nd        | p             | nd               | nd          | nd              | nd                          | nd          |
|    |     |     | LE  | 10/10                   | 0.00  | N                   | p  | p  | nd | nd        | p             | nd               | nd          | nd              | nd                          | nd          |
| 14 | 32  | F   | RE  | 10/10                   | 0.00  | N                   | p  | p  | p  | nd        | nd            | p                | nd          | FP              | nd                          | nd          |
|    |     |     | LE  | 9/10                    | 0.00  | N                   | p  | p  | p  | nd        | p             | p                | nd          | FP              | nd                          | nd          |
| 15 | 32  | F   | RE  | 10/10                   | -4.25 | N                   | p  | p  | p  | nd        | nd            | nd               | nd          | nd              | nd                          | nd          |
|    |     |     | LE  | 10/10                   | -4.50 | N                   | p  | p  | p  | nd        | nd            | nd               | nd          | nd              | nd                          | nd          |
| 16 | 33  | F   | RE  | 10/10                   | 0.00  | N                   | p  | p  | p  | nd        | p             | nd               | nd          | nd              | nd                          | nd          |
|    |     |     | LE  | 10/10                   | 0.00  | N                   | p  | p  | p  | nd        | p             | nd               | nd          | nd              | nd                          | nd          |
| 17 | 34  | F   | RE  | 5/10                    | -1.25 | N                   | p  | p  | p  | p         | p             | nd               | foveal      | BD              | nd                          | nd          |
|    |     |     | LE  | 3.2/10                  | -1.50 | N                   | p  | p  | p  | p         | p             | nd               | foveal      | BD              | nd                          | nd          |
| 18 | 35  | F   | RE  | 10/10                   | 0.00  | N                   | p  | p  | p  | p         | p             | nd               | nd          | nd              | nd                          | nd          |
|    |     |     | LE  | 10/10                   | 0.00  | N                   | p  | p  | p  | p         | p             | nd               | nd          | nd              | nd                          | nd          |
| 19 | 36  | F   | RE  | 10/10                   | 1.88  | N                   | p  | p  | p  | nd        | nd            | nd               | nd          | nd              | nd                          | nd          |
|    |     |     | LE  | 10/10                   | 1.50  | N                   | p  | p  | p  | nd        | nd            | nd               | nd          | nd              | nd                          | nd          |
| 20 | 38  | F   | RE  | 10/10                   | 0.00  | N                   | p  | p  | p  | nd        | p             | nd               | foveal      | FP              | nd                          | nd          |
|    |     |     | LE  | 1.6/10                  | 0.00  | N                   | p  | p  | p  | nd        | p             | nd               | foveal      | UN              | posterior pole atrophy      | nd          |
| 21 | 40  | F   | RE  | 10/10                   | 0.00  | N                   | p  | p  | p  | p         | p             | nd               | nd          | nd              | nd                          | nd          |
|    |     |     | LE  | 10/10                   | 0.00  | N                   | p  | p  | p  | nd        | p             | nd               | nd          | nd              | nd                          | nd          |
| 22 | 41  | M   | RE  | 2.5/10                  | 0.00  | N                   | p  | p  | p  | nd        | p             | nd               | nd          | nd              | nd                          | nd          |
|    |     |     | LE  | 10/10                   | 0.00  | N                   | p  | p  | p  | p         | p             | nd               | foveal      | nd              | nd                          | nd          |
| 23 | 41  | F   | RE  | 10/10                   | -4.25 | N                   | p  | p  | p  | nd        | p             | p                | nd          | nd              | nd                          | nd          |
|    |     |     | LE  | 10/10                   | -5.00 | N                   | p  | p  | p  | nd        | p             | p                | nd          | nd              | nd                          | nd          |
| 24 | 41  | F   | RE  | 10/10                   | 0.00  | N                   | p  | p  | p  | nd        | p             | nd               | nd          | nd              | nd                          | nd          |
|    |     |     | LE  | 10/10                   | 0.00  | N                   | p  | p  | p  | nd        | p             | nd               | nd          | nd              | nd                          | nd          |
| 25 | 44  | F   | RE  | 10/10                   | 0.00  | N                   | p  | p  | p  | nd        | p             | nd               | extrafoveal | nd              | nd                          | nd          |
|    |     |     | LE  | 10/10                   | 0.00  | N                   | p  | p  | p  | nd        | p             | nd               | extrafoveal | nd              | nd                          | nd          |
| 26 | 46  | F   | RE  | 10/10                   | 0.00  | N                   | p  | p  | p  | nd        | p             | nd               | nd          | nd              | nd                          | nd          |
|    |     |     | LE  | 10/10                   | 0.00  | N                   | p  | p  | p  | nd        | p             | nd               | nd          | nd              | nd                          | nd          |
| 27 | 47  | F   | RE  | 10/10                   | -3.75 | N                   | p  | p  | p  | p         | p             | p                | nd          | FF/YD           | nd                          | nd          |
|    |     |     | LE  | 10/10                   | -3.00 | N                   | p  | p  | p  | p         | p             | nd               | nd          | FF/YD           | nd                          | nd          |
| 28 | 47  | M   | RE  | 5/10                    | 0.00  | N                   | p  | p  | p  | p         | p             | nd               | foveal      | FF/YD           | inside the vascular arcades | nd          |
|    |     |     | LE  | 4/10                    | 0.00  | N                   | p  | p  | p  | p         | p             | p                | foveal      | FF/YD           | inside the vascular arcades | nd          |
| 29 | 48  | F   | RE  | 2/10                    | 1.50  | congenital cataract | p  | p  | p  | nd        | nd            | nd               | foveal      | nd              | inside the vascular arcades | p           |
|    |     |     | LE  | 8/10                    | 0.50  | congenital cataract | p  | p  | p  | nd        | nd            | nd               | foveal      | nd              | inside the vascular arcades | nd          |
| 30 | 48  | F   | RE  | 2/10                    | -6.13 | N                   | p  | p  | p  | p         | p             | nd               | foveal      | VD              | inside the vascular arcades | nd          |

|    |    |   |    |                      |       |              |    |    |   |    |    |             |       |                             |    |
|----|----|---|----|----------------------|-------|--------------|----|----|---|----|----|-------------|-------|-----------------------------|----|
|    |    |   | LE | 7/10                 | -7.25 | N            | p  | p  | p | p  | nd | nd          | VD    | inside the vascular arcades | nd |
| 31 | 48 | F | RE | 1.6/10               | -0.75 | pseudophakic | nd | nd | p | nd | nd | nd          | nd    | posterior pole atrophy      | nd |
|    |    |   | LE | 1/10                 | -1.25 | cataract     | nd | nd | p | nd | nd | nd          | nd    | posterior pole atrophy      | nd |
| 32 | 49 | F | RE | 6.2/10               | 5.50  | N            | p  | p  | p | p  | nd | nd          | nd    | nd                          | nd |
|    |    |   | LE | 1.6/10               | 6.50  | cataract     | p  | p  | p | nd | p  | nd          | nd    | nd                          | nd |
| 33 | 50 | F | RE | 10/10                | 6.75  | N            | p  | p  | p | p  | p  | extrafoveal | nd    | nd                          | nd |
|    |    |   | LE | 10/10                | 5.50  | N            | p  | p  | p | nd | p  | nd          | nd    | nd                          | nd |
| 34 | 51 | M | RE | 1.6/10               | -0.75 | N            | nd | nd | p | nd | nd | foveal      | UN    | posterior pole atrophy      | nd |
|    |    |   | LE | 1/16                 | 0.00  | N            | nd | nd | p | nd | nd | foveal      | UN    | posterior pole atrophy      | nd |
| 35 | 52 | F | RE | 1/20                 | 0.00  | N            | p  | p  | p | p  | nd | foveal      | nd    | inside the vascular arcades | nd |
|    |    |   | LE | light perception     | 0.00  | N            | p  | p  | p | p  | nd | foveal      | nd    | inside the vascular arcades | nd |
| 36 | 55 | F | RE | 6.2/10               | 0.00  | N            | p  | p  | p | nd | p  | foveal      | nd    | inside the vascular arcades | nd |
|    |    |   | LE | hand motion          | 0.00  | N            | p  | p  | p | nd | p  | foveal      | nd    | posterior pole atrophy      | nd |
| 37 | 55 | F | RE | 10/10                | -2.50 | N            | p  | p  | p | p  | nd | foveal      | UN    | nd                          | nd |
|    |    |   | LE | 10/10                | -0.75 | N            | p  | p  | p | p  | nd | nd          | UN    | nd                          | nd |
| 38 | 56 | F | RE | 10/10                | -1.25 | N            | p  | p  | p | p  | nd | nd          | FP    | nd                          | nd |
|    |    |   | LE | 10/10                | -1.50 | N            | p  | p  | p | nd | nd | nd          | FP    | nd                          | nd |
| 39 | 56 | F | RE | 1/20                 | -3.00 | N            | p  | p  | p | nd | p  | foveal      | UN    | posterior pole atrophy      | nd |
|    |    |   | LE | 4/10                 | -3.50 | N            | p  | p  | p | nd | p  | foveal      | UN    | posterior pole atrophy      | nd |
| 40 | 57 | F | RE | 1.6/10               | 0.75  | N            | p  | p  | p | nd | nd | foveal      | UN    | posterior pole atrophy      | nd |
|    |    |   | LE | 1.6/10               | 0.75  | N            | p  | p  | p | nd | p  | foveal      | UN    | posterior pole atrophy      | nd |
| 41 | 58 | F | RE | 1/20                 | 0.00  | cataract     | p  | p  | p | nd | p  | foveal      | FF/YD | posterior pole atrophy      | nd |
|    |    |   | LE | 2/10                 | 0.00  | psedophakic  | p  | p  | p | nd | p  | foveal      | FF/YD | posterior pole atrophy      | nd |
| 42 | 58 | F | RE | 10/10                | 0.00  | N            | p  | p  | p | nd | nd | extrafoveal | UN    | nd                          | nd |
|    |    |   | LE | 7/10                 | 0.00  | N            | p  | p  | p | nd | nd | foveal      | UN    | inside the vascular arcades | nd |
| 43 | 59 | F | RE | 1.6/10               | 1.00  | N            | p  | p  | p | nd | p  | foveal      | FF/YD | inside the vascular arcades | P  |
|    |    |   | LE | 6.2/10               | 0.50  | N            | p  | p  | p | nd | p  | nd          | FF/YD | inside the vascular arcades | P  |
| 44 | 60 | F | RE | 5/10                 | 0.88  | cataract     | nd | nd | p | nd | nd | foveal      | nd    | inside the vascular arcades | nd |
|    |    |   | LE | 1/20                 | 0.00  | cataract     | nd | nd | p | nd | nd | foveal      | nd    | inside the vascular arcades | nd |
| 45 | 61 | F | RE | no light perception* | 0.00  | cataract     | nd | nd | p | nd | p  | foveal      | UN    | posterior pole atrophy      | nd |
|    |    |   | LE | 3.2/10               | -3.50 | cataract     | nd | nd | p | nd | p  | foveal      | UN    | posterior pole atrophy      | nd |
| 46 | 61 | M | RE | 1/10                 | -1.50 | N            | nd | nd | p | nd | p  | foveal      | UN    | posterior pole atrophy      | nd |
|    |    |   | LE | 1.6/10               | -1.50 | N            | nd | nd | p | nd | p  | foveal      | UN    | posterior pole atrophy      | nd |
| 47 | 62 | M | RE | 10/10                | -2.00 | N            | p  | p  | p | nd | p  | foveal      | FP    | inside the vascular arcades | nd |
|    |    |   | LE | 2/10                 | -2.40 | N            | p  | p  | p | nd | p  | foveal      | UN    | inside the vascular arcades | nd |
| 48 | 62 | F | RE | 1/12                 | 0.00  | N            | p  | p  | p | nd | p  | extrafoveal | FF/YD | inside the vascular arcades | nd |
|    |    |   | LE | 10/10                | 0.00  | N            | p  | p  | p | nd | nd | extrafoveal | FF/YD | inside the vascular arcades | nd |
| 49 | 63 | F | RE | 1/40                 | 0.00  | cataract     | nd | nd | p | nd | p  | foveal      | FF/YD | posterior pole atrophy      | nd |
|    |    |   | LE | 1/40                 | 0.00  | cataract     | nd | nd | p | nd | p  | foveal      | FF/YD | posterior pole atrophy      | nd |
| 50 | 63 | M | RE | 4/10                 | -3.00 | cataract     | p  | p  | p | nd | nd | foveal      | nd    | inside the vascular arcades | nd |
|    |    |   | LE | 1/20                 | -3.00 | cataract     | p  | p  | p | nd | nd | foveal      | nd    | posterior pole atrophy      | nd |
| 51 | 65 | F | RE | 1/10                 | -2.00 | N            | nd | nd | p | nd | p  | foveal      | UN    | posterior pole atrophy      | nd |
|    |    |   | LE | 1/50                 | 0.50  | N            | nd | nd | p | nd | p  | foveal      | UN    | posterior pole atrophy      | nd |
| 52 | 68 | F | RE | 1/20                 | 0.00  | cataract     | p  | p  | p | nd | nd | foveal      | UN    | posterior pole atrophy      | nd |
|    |    |   | LE | 5/10                 | 0.00  | cataract     | p  | p  | p | nd | nd | foveal      | UN    | inside the vascular arcades | nd |
| 53 | 69 | M | RE | hand motion          | 0.00  | cataract     | nd | nd | p | nd | p  | foveal      | UN    | posterior pole atrophy      | nd |
|    |    |   | LE | hand motion          | 0.00  | cataract     | nd | nd | p | nd | nd | foveal      | UN    | posterior pole atrophy      | nd |

AS: angioid streaks; BD: butterfly shaped dystrophy; CL: comet lesion; CO: *coquille d'oeuf*; EqS: splerical equivalent; FF/YD: *fundus flavimaculatus*/yellowish deposits; FP: *fundus pulverulentus*; N: normal; nd: not detectable; p: present; PD: *Pattern dystrophy*; PO: *Peau d'orange*; UN: unclassified; VD: vitelliform dystrophy.

\*Patient #45 was also affected by glaucoma
