# Supplementary material for: Phenotypic Features and Genetic Findings in a Cohort of Italian Pseudoxanthoma Elasticum Patients and Update of the Ophthalmologic Evaluation Score
Source: MDPI journal article supplement (doi:10.3390/jcm10122710), 2021-06-19
Supplement: s1 [file s1]

**Table S4.** Frequency of singular ocular manifestations according to the characteristics of rare sequence variants detected in 53 PXE patients who underwent in-depth ophthalmological investigation. Group M= two missense variants; group NF= two sequence variants causing a reduced protein production or a protein to be likely non-functional; group M+NF= one missense and one “NF” variant.

| Ocular manifestation                  | Group NF (n=25) | Group M+NF (n= 19) | Group M (n=9) |
|---------------------------------------|-----------------|--------------------|---------------|
| <i>Peau d’orange/ Coquille d’oeuf</i> | 21 (84%)        | 16 (84%)           | 8 (89%)       |
| Angioid streaks                       | 23 (92%)        | 17 (89%)           | 9 (100%)      |
| Comet lesion                          | 21 (84%)        | 14 (74%)           | 5 (55%)       |
| Choroidal neovascularization          | 12 (48%)        | 11 (58%)           | 4 (44%)       |
| Pattern dystrophy-like changes        | 10 (40%)        | 8 (42%)            | 4 (44%)       |
| Posterior pole atrophy                | 7 (28%)         | 7(37%)             | 0 (0%)        |
| Optic disc drusen                     | 1 (4%)          | 0 (0%)             | 2 (22%)       |
