# Supplementary material for: Phenotypic Features and Genetic Findings in a Cohort of Italian Pseudoxanthoma Elasticum Patients and Update of the Ophthalmologic Evaluation Score
Source: MDPI journal article supplement (doi:10.3390/jcm10122710), 2021-06-19
Supplement: s1 [file s1]

**Table S1.** Missense point variants evaluated for their pathogenicity using different *in silico* tools.

| Exon | Nucleotide variation | Amino acid variation | PolyPhen-2                      | Panther                    | Align GVGD |
|------|----------------------|----------------------|---------------------------------|----------------------------|------------|
| 9    | c.1160G>T            | p.Gly387Val          | Probably damaging (Score 1.00)  | Probably damaging (PT 456) | Class C65  |
| 9    | c.1174A>G            | p.Lys392Glu          | Probably damaging (Score 1.00)  | Probably damaging (PT 842) | Class C55  |
| 9    | c.1175A>G            | p.Lys392Arg          | Probably damaging (Score 1.00)  | Probably damaging (PT 842) | Class C25  |
| 10   | c.1220G>A            | p.Gly407Asp          | Probably damaging (Score 1.00)  | Probably damaging (PT 910) | Class C65  |
| 10   | c.1255C>T            | p.Arg419Trp          | Probably damaging (Score 0.983) | Probably damaging (PT 910) | Class C65  |
| 19   | c.2504G>A            | p.Gly835Asp          | Probably damaging (Score 0.999) | Probably damaging (PT 910) | Class C65  |
| 23   | c.3037G>A            | p.Gly1013Arg         | Probably damaging (Score 0.999) | Probably damaging (PT 221) | Class C65  |
| 25   | c.3563C>G            | p.Thr1188Arg         | Probably damaging (Score 0.965) | Probably benign (PT 97)    | Class C65  |
| 26   | c.3735G>A            | p.Glu1245=           | /                               | Probably damaging (PT 842) | /          |
| 28   | c.3892G>A            | p.Val1298Ile         | Probably damaging (Score 0.965) | Probably damaging (PT 842) | Class C25  |
| 30   | c.4361T>C            | p.Leu1454Pro         | Probably damaging (Score 0.99)  | Probably benign (PT 176)   | Class C65  |
| 30   | c.4403G>A            | p.Arg1468Gln         | Probably damaging (Score 0.976) | Probably damaging (PT 456) | Class C35  |

PT: preservation time

FI: Functional impact
